# Supplementary material for: An Automated Organoid Platform with Inter-organoid Homogeneity and Inter-patient Heterogeneity
Source: PubMed Central journal article supplement — Cell Rep Med. 2020 Dec 22;1(9):100161. doi: 10.1016/j.xcrm.2020.100161 (PMC7762778; doi:10.1016/j.xcrm.2020.100161), 2020-12-22
Supplement: mmc1.pdf [file mmc1.pdf]

**Cell Reports Medicine, Volume 1**

**Supplemental Information**

**An Automated Organoid Platform  
with Inter-organoid Homogeneity  
and Inter-patient Heterogeneity**

**Shengwei Jiang, Haoran Zhao, Weijie Zhang, Jiaqi Wang, Yuhong Liu, Yuanxiong Cao, Honghui Zheng, Zhiwei Hu, Shubin Wang, Yu Zhu, Wei Wang, Shuzhong Cui, Peter E. Lobie, Laiqiang Huang, and Shaohua Ma**

*Supplementary Information*

**An automated organoid platform with inter-organoid homogeneity and inter-patient heterogeneity**

Shengwei Jiang<sup>1,2,8</sup>, Haoran Zhao<sup>1,8</sup>, Weijie Zhang<sup>3,8</sup>, Jiaqi Wang<sup>1</sup>, Yuhong Liu<sup>2,4</sup>, Yuanxiong Cao<sup>1</sup>,

Honghui Zheng<sup>1</sup>, Zhiwei Hu<sup>1</sup>, Shubin Wang<sup>5</sup>, Yu Zhu<sup>5</sup>, Wei Wang<sup>6</sup>, Shuzhong Cui<sup>7</sup>, Peter E. Lobie<sup>1</sup>,

Laiqiang Huang<sup>1,2,4,\*</sup>, Shaohua Ma<sup>1,9,\*</sup>

\*. Corresponding Authors, Email: [ma.shaohua@sz.tsinghua.edu.cn](mailto:ma.shaohua@sz.tsinghua.edu.cn); [huanglq@tsinghua.edu.cn](mailto:huanglq@tsinghua.edu.cn)

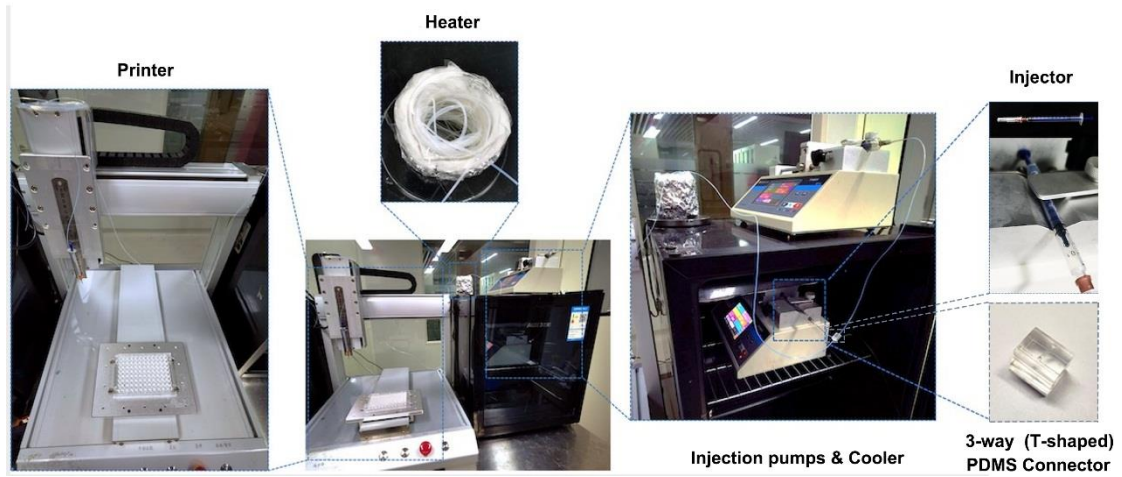

Figure S1. The automated organoid system setup. Related to Figure 1.

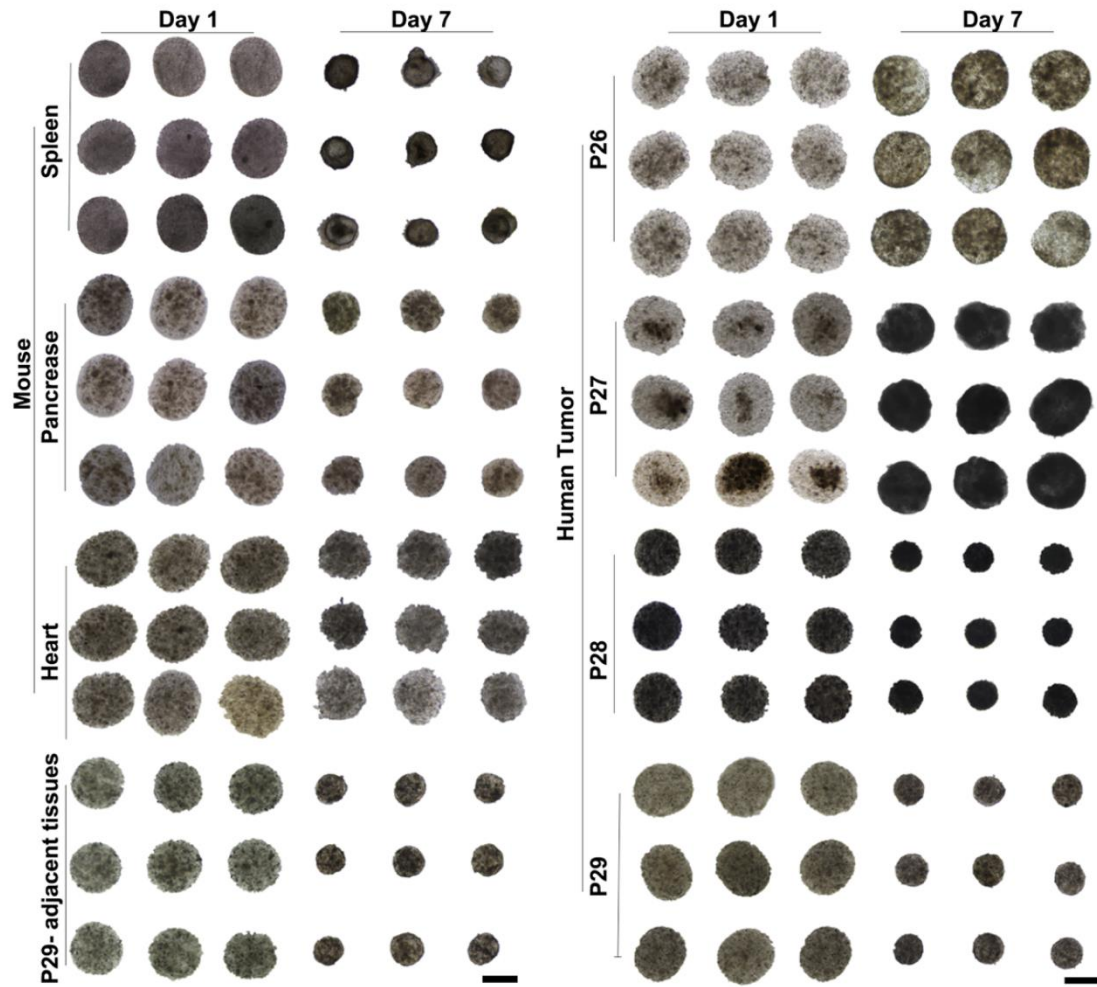

**Figure S2. Additional organoid precursors and organoids from mouse organs and human tumors.**

(A) Bright-field images of organoid precursors and organoids derived from mouse spleen, pancreas, heart and human tumor P29 adjacent (healthy) tissues acquired on day 1 and day 7; (B) Bright-field images of organoid precursors and organoids derived from human tumor P26, P27, P28, P29 acquired on day 1 and day 7. Scale bar in all panels: 400  $\mu\text{m}$ . Related to Figure 2.

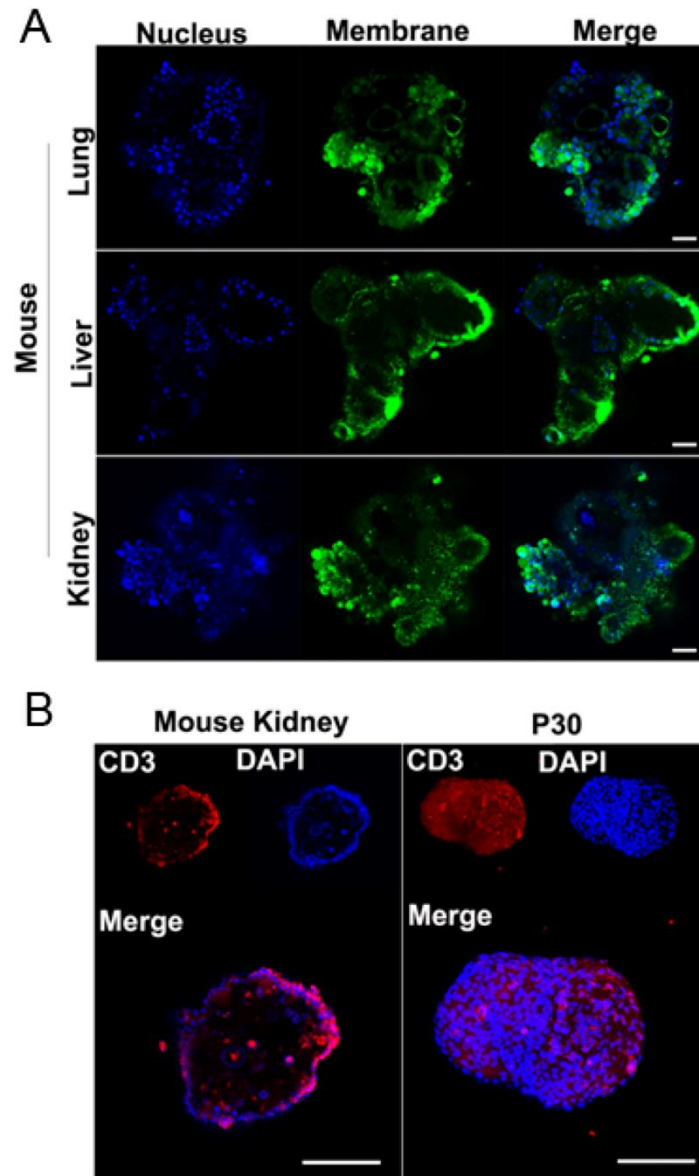

**Figure S3. Organotypic constructs and immune microenvironment of multiple organoids.** (A) Fluorescent images of organoids derived from mouse lung, liver and kidney, by staining the cell membrane with CMFDA and the nuclei with DAPI. Scale bar in all panels: 200  $\mu\text{m}$ ; (B) Immunofluorescence staining for CD3 of the organoids derived from mouse kidney and P30 tumor, by using a Nikon A1R+ Laser scanning confocal microscopy. Scale bar in all panels: 300  $\mu\text{m}$ . Related to Figure 3.



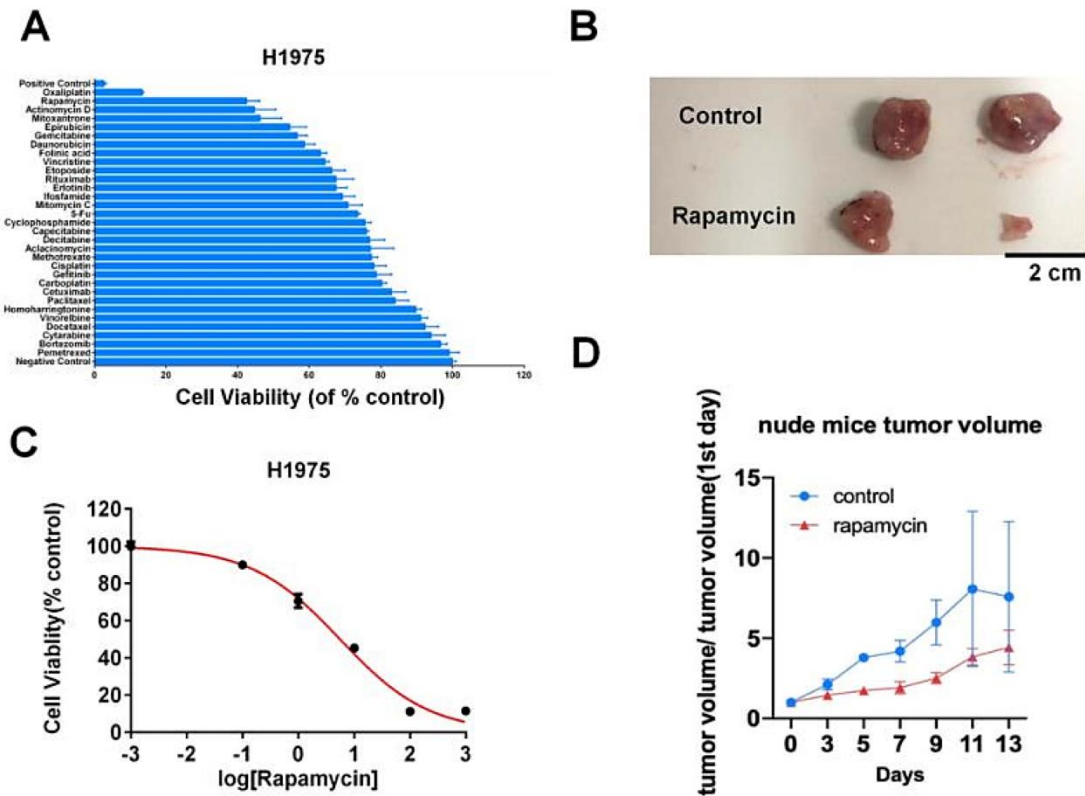

**Figure S5. Validation of organoid screening using xenograft mice.** (A) H1975 organoid cell viability quantification by conditioning organoids in single drugs at 10  $\mu$ M for 2 days ( $n = 3$ ); (B) xenograft outcome by dosing the mice with Rapamycin for 13 days ( $n = 2$ ), Scale bar, 2 cm; (C) the dose-response curve of H1975 organoid to Rapamycin for 2 days ( $n = 3$ ); (D) the measure of tumor growth over 13 days by dosing the mice with Rapamycin at 2.0 mg/kg ( $n = 2$ ). Related to Figure 5.

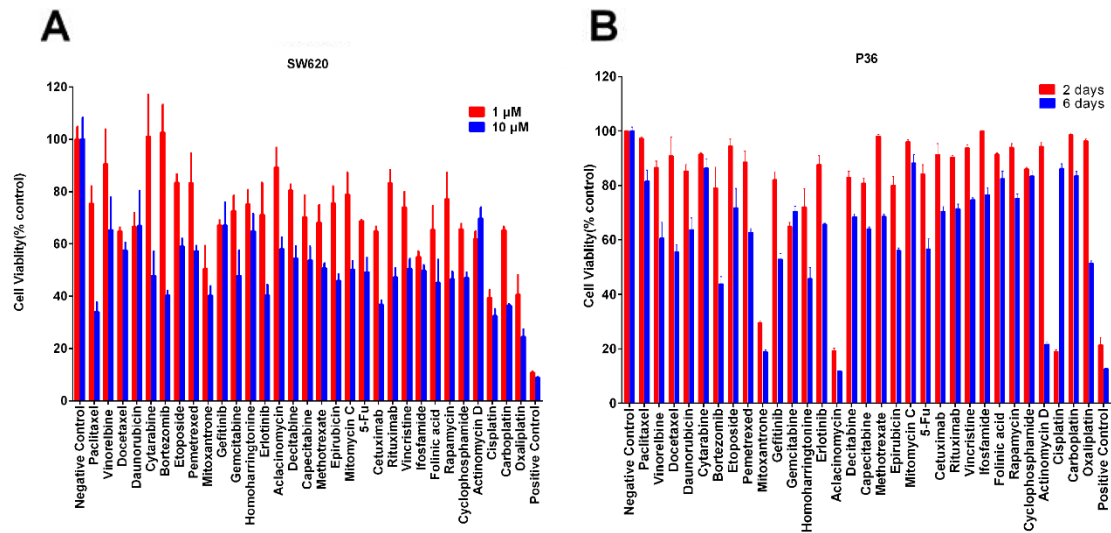

**Figure S6. Drugs screening by organoids in different days and different concentration. (A)**

Comparison of the drug screening outcome of P36 organoids (D7), evaluated after being cultured on drug conditions for 2 days and 6 days, respectively (n = 3). (B) Cell viability of SW620 organoids cultured in different single drugs at 1  $\mu$ M or 10  $\mu$ M for 2 days, as the prescreening for single drug recommendation.

The SW620 cells were initially loaded in Matrigel at  $2 \times 10^7$  cells per mL (n = 3). Related to Figure 5.



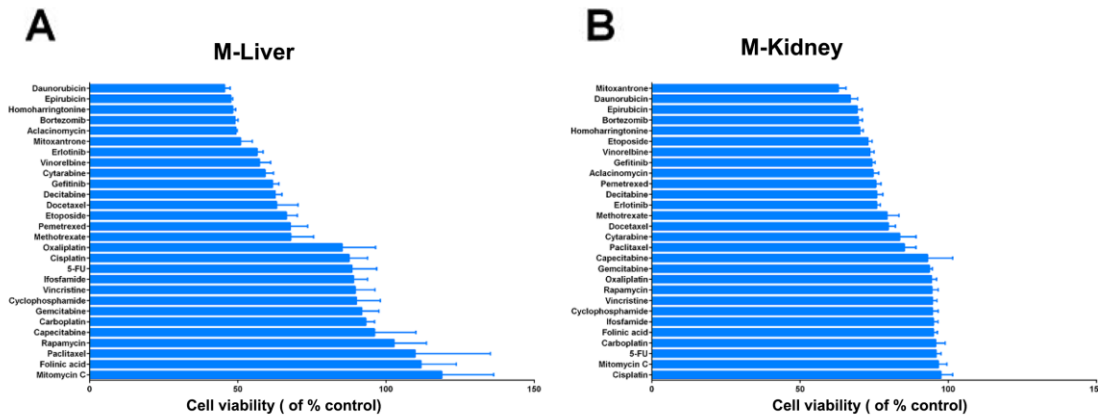

**Figure S7.** Detailed screening outcome of the anti-tumor drug hepatotoxicity and nephrotoxicity on mouse liver (A) and kidney (B) organoids (n = 4). Related to Figure 7.

**Table S1. Comparison of traditional organoid using 96-well plate and a droplet organoid. Scale bar:**

50  $\mu\text{m}$ . Related to Figure 5.

|                                  | <b>Traditional organoids,<br/>2 weeks</b>                                         | <b>Droplet organoids,<br/>1 week</b>                                               |
|----------------------------------|-----------------------------------------------------------------------------------|------------------------------------------------------------------------------------|
| <b>Organoid<br/>portrait</b>     | 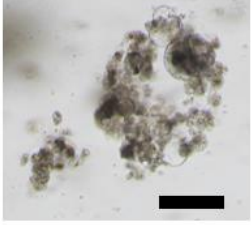 |  |
| <b>Matrigel use<br/>per well</b> | 30 $\mu\text{l}$                                                                  | ~ 0.1 $\mu\text{l}$                                                                |

**Table S2. Clinical characteristics of the patients in this study.** Related to Figure 5 and 6.

|            | <b>Histopathology</b>              | <b>Tumor Stage</b>  | <b>Clinical Treatment</b>                        | <b>Chemotherapy Cycle</b> | <b>Clinical Response</b> |
|------------|------------------------------------|---------------------|--------------------------------------------------|---------------------------|--------------------------|
| <b>P1</b>  | Lung squamous carcinoma            | T2aN0M0, Phase IB   | No Chemotherapy                                  | NA                        | NA                       |
| <b>P2</b>  | hepatocellular carcinoma           | T3N0M0, Phase IIIA  | No Chemotherapy                                  | NA                        | NA                       |
| <b>P3</b>  | thymoma                            | T1N0M0, Phase I     | No Chemotherapy                                  | NA                        | NA                       |
| <b>P4</b>  | Esophagus small cell carcinoma     | T3N2M0, Phase IIIB  | Etoposide                                        | 3                         | SD                       |
| <b>P5</b>  | Gastric adenocarcinoma             | T3N0M1, Phase IV    | 5-FU + Oxaliplatin                               | 1                         | SD                       |
| <b>P6</b>  | Gastric adenocarcinoma             | T3N1M0, Phase IIB   | Oxaliplatin                                      | 1                         | SD                       |
| <b>P7</b>  | Esophageal squamous cell carcinoma | T3N2M0, Phase IIIB  | Docetaxel                                        | 2                         | SD                       |
| <b>P8</b>  | Gastric adenocarcinoma             | T3N3aM0, Phase IIIB | Oxaliplatin                                      | 3                         | SD                       |
| <b>P9</b>  | Colonic adenocarcinoma             | T3N1M1b, Phase IVB  | 5-FU + Folinic acid + Oxaliplatin + Capecitabine | 5                         | SD                       |
| <b>P10</b> | Colonic adenocarcinoma             | T3N1M0, Phase IIIB  | Oxaliplatin, Oxaliplatin + Capecitabine          | 2                         | SD                       |
| <b>P11</b> | Rectal adenocarcinoma              | T3N0M0, Phase IIA   | Capecitabine                                     | 2                         | SD                       |
| <b>P12</b> | Colonic adenocarcinoma             | T3N2M0, Phase IIIB  | 5-FU + Oxaliplatin                               | 2                         | SD                       |
| <b>P13</b> | Rectal adenocarcinoma              | T3N2M0, Phase IIIB  | 5-FU + Oxaliplatin                               | 1                         | SD                       |
| <b>P14</b> | Rectal adenocarcinoma              | T3N0M0, Phase IIIB  | Oxaliplatin + Capecitabine                       | 4                         | SD                       |
| <b>P15</b> | Colonic adenocarcinoma             | T3N0M0, Phase IIA   | Oxaliplatin + Capecitabine                       | 3                         | SD                       |
| <b>P16</b> | Colonic adenocarcinoma             | T3N1M1, Phase IVB   | Oxaliplatin + Capecitabine                       | 3                         | SD                       |
| <b>P17</b> | Pulmonary adenocarcinoma           | T2AN0M0, Phase IB   | Cisplatin + Pemetrexed (disodium)                | 4                         | SD                       |
| <b>P18</b> | Rectal adenocarcinoma              | T2N0M0, Phase I     | Capecitabine + Oxaliplatin                       | 4                         | SD                       |
| <b>P19</b> | Gastric adenocarcinoma             | T3N2M1, Phase IV    | Docetaxel                                        | 1                         | PD                       |
| <b>P20</b> | Hepatic adenocarcinoma             | T1N0M0, Phase I     | Gemcitabine                                      | 1                         | PD                       |
| <b>P21</b> | Colonic adenocarcinoma             | T3N0M0, Phase IIA   | Capecitabine + Oxaliplatin                       | 3                         | SD                       |

|            |                          |                    |                            |    |    |
|------------|--------------------------|--------------------|----------------------------|----|----|
| <b>P22</b> | Colonic adenocarcinoma   | T3N2M0, Phase IIIB | Oxaliplatin                | 5  | SD |
| <b>P23</b> | Rectal adenocarcinoma    | T3N0M0, Phase IIA  | Oxaliplatin + Capecitabine | 3  | SD |
| <b>P24</b> | Colonic adenocarcinoma   | T3N0M0, Phase IIA  | Oxaliplatin + Capecitabine | 3  | SD |
| <b>P25</b> | Gastric adenocarcinoma   | T3N2M0, Phase IIIA | No Chemotherapy            | NA | NA |
| <b>P26</b> | Urothelial carcinoma     | T1N0M0, Phase I    | No Chemotherapy            | NA | NA |
| <b>P27</b> | Colonic adenocarcinoma   | T3N0M0, Phase IIA  | No Chemotherapy            | NA | NA |
| <b>P28</b> | Pulmonary adenocarcinoma | T3N0M0, Phase IIB  | No Chemotherapy            | NA | NA |
| <b>P29</b> | Pulmonary adenocarcinoma | T2BN0M0, Phase IIA | No Chemotherapy            | NA | NA |
| <b>P30</b> | Rectal adenocarcinoma    | T3N1M0, Phase IIIB | No Chemotherapy            | NA | NA |
| <b>P31</b> | Rectal adenocarcinoma    | T3N0M0, Phase IIA  | No Chemotherapy            | NA | NA |
| <b>P33</b> | Rectal adenocarcinoma    | T3N0M0, Phase I    | No Chemotherapy            | NA | NA |
| <b>P34</b> | Colonic adenocarcinoma   | T3N0M0, Phase IIA  | No Chemotherapy            | NA | NA |
| <b>P35</b> | Colonic adenocarcinoma   | T2N0M0, Phase I    | No Chemotherapy            | NA | NA |
| <b>P36</b> | Colonic adenocarcinoma   | T3N1M0, Phase IIIB | No Chemotherapy            | NA | NA |
| <b>P37</b> | Rectal adenocarcinoma    | T3N0M0, Phase I    | No Chemotherapy            | NA | NA |
| <b>P38</b> | Rectal adenocarcinoma    | T3N0M0, Phase I    | No Chemotherapy            | NA | NA |
